# Supplementary material for: LSPR-enhanced photocatalytic N2 fixation over Z-scheme POMOF-derived Cu/WO2 modified C-BiOBr with multiple active sites
Source: Royal Society of Chemistry journal article supplement (doi:10.1039/d4qi02128b), 2024-01-01
Supplement: d4qi02128b1.pdf [file d4qi02128b1.pdf]

## Supporting Information

# **LSPR-enhanced photocatalytic N<sub>2</sub> fixation over Z-scheme POMOF-derived Cu/WO<sub>2</sub> modified C-BiOBr with multiple active sites**

Xue Yang, Donghui Cui, Tingting Zhang, Yu Liu, Fengyan Li\*

*Key Laboratory of Polyoxometalate and Reticular Material Chemistry of Ministry of Education,  
College of Chemistry, Northeast Normal University, Changchun 130024, P. R. China*

*Email address: lify525@nenu.edu.cn*

## Experimental section

### 1 Materials

Bismuth nitrate pentahydrate ( $\text{Bi}(\text{NO}_3)_3 \cdot 5\text{H}_2\text{O}$ , 99%), polyvinylpyrrolidone (PVP), glucose ( $\text{C}_6\text{H}_{12}\text{O}_6 \cdot \text{H}_2\text{O}$ ), copper acetate monohydrate ( $\text{C}_4\text{H}_6\text{CuO}_4 \cdot \text{H}_2\text{O}$ , 99%), phosphotungstic acid ( $\text{H}_3\text{PW}_{12}\text{O}_{40} \cdot x\text{H}_2\text{O}$ ), 1,3,5-benzenetricarboxylic acid ( $\text{C}_9\text{H}_6\text{O}_6$ , 98%), ethylene glycol (EG) and anhydrous ethanol were purchased from Sinopharm Chemical Reagent Co. Cetyltrimethylammonium bromide (CTAB, 99%), L-glutamic acid ( $\text{C}_5\text{H}_9\text{NO}_4$ , 99%) were purchased from Aladdin Chemical Reagent Co. The experimental water was deionized water (DI).

### 2 Determination of $\text{NH}_3$

The  $\text{NH}_4^+$  production was determined spectrophotometrically using Nessler's reagent [1]. Nessler's reagent was purchased from Aladdin Chemical Reagents Ltd. Potassium sodium tartrate ( $\text{KNaC}_4\text{H}_6\text{O}_6$ ) was added to minimize the interference of other ions ( $\text{Fe}^{3+}$ ,  $\text{Ca}^{2+}$ ,  $\text{Mg}^{2+}$ ,  $\text{Cr}^{3+}$ ,  $\text{Ag}^+$ ,  $\text{S}^{2-}$  etc.). 25 g of  $\text{KNaC}_4\text{H}_6\text{O}_6$  and 50 mL of deionized water were added to a distillation flask and sonicated for 30 min to form a homogeneous solution, then 0.5 mL of 5 moles/liter sodium hydroxide solution was added, and about 20-30% of the original volume of solvent was evaporated by heating at  $110^\circ\text{C}$ . The solution was then cooled to room temperature and fixed to a volume in a 50 mL volumetric flask to prepare it for use. A calibrated concentration-absorbance curve of standard ammonia solution was obtained using 5 ml of gradient concentration of ammonium chloride solution, 0.1 mL of  $\text{KNaC}_4\text{H}_6\text{O}_6$  solution and 0.1 mL of Nessler's reagent (Fig. S1). The absorbance value of the fitted curve ( $y = 2.7797x + 0.0167$ ,  $R^2 = 0.9999$ ) showed a good linear relationship with the ammonia concentration. Ammonia production from the synthesized photocatalysts was detected by mixing 5 mL of centrifugally filtered reaction solution with 0.1 mL of  $\text{KNaC}_4\text{H}_6\text{O}_6$  solution and 0.1 mL of Nessler's reagent under dark conditions for 15 min and then detected by UV-visible spectrophotometer at 420 nm.

### 3 Determination of $\text{N}_2\text{H}_4$

The hydrazine content in the solution after photocatalysis was determined by Watt's and Crisp's methods [2]. The color developer was prepared by dissolving p-dimethylaminobenzaldehyde and hydrochloric acid in ethanol. Hydrazine standard solution of gradient concentration was mixed with the color developer to obtain the standard curve. Then 2 mL of the colorant was added into 2 mL of centrifugal reaction solution, which was allowed to stand for 20 min and then detected by UV-visible spectrophotometer at 460 nm.

#### 4 N<sub>2</sub> temperature-programmed desorption (N<sub>2</sub>-TPD)

100 mg of catalyst was placed in a u-shaped quartz tube and He gas flow was pretreated to 300 °C at a ramp rate of 10 °C/min, preheated at a flow rate of 50 mL/min for 1 h, and then cooled to 50 °C. After pretreatment, feed N<sub>2</sub> was passed and adsorbed to saturation at 25 °C at a flow rate of 50 mL/min. Then, the physical adsorption of N<sub>2</sub> was removed by He flow (50 mL min<sup>-1</sup>) at 50 °C for 1 h. The catalyst was then passed through the catalyst at a flow rate of 50 mL/min for 1 h to remove the N<sub>2</sub> physically adsorbed. Finally, the catalyst was heated at a rate of 10 C min<sup>-1</sup> from 50 °C to 600 °C. An on-line analytical heat transfer detector (TPD, microcrystalline AutoChem II 2920) was used.

#### 5 Inductively coupled plasma atomic emission spectroscopy (ICP-AES)

5 mg of the sample was dissolved in 5 ml of aqua regia, stirred for 30 minutes and kept in an oven at 100° C for 6 hours. The cooled solution was filtered and fixed in a 25 ml volumetric flask for testing.

#### 6 Electrochemical tests

Electrochemical testing was performed using a CHI661D electrochemical workstation. The light source was a 300 W xenon lamp with an AM1.5 filter and a >700 nm visible cut-off filter. The working electrode was a photocatalytic material, the reference electrode was Hg/HgCl<sub>2</sub> and the counter electrode was a platinum foil. Typically, 50 mg of sample, 100 mg of geraniol and 5 mg of ethyl cellulose were

thoroughly mixed with 5 ml of ethanol in an onyx mortar and then uniformly covered on the FTO glass sheet as the working electrode. The photoelectric properties of these materials were studied using 0.5 M Na<sub>2</sub>SO<sub>4</sub> aqueous solution as the electrolyte solution.

## 7 DFT calculations

The first-principles calculations are performed using the framework of density functional theory (DFT) within the Vienna Ab-initio simulation package (VASP) [3]. The exchange-correlation interaction was processed using a generalized gradient approximation (GGA) in the form of Perdew-Burke-Ernzerhof (PBE) [4]. The thickness of the vacuum layer in the Z-direction was fixed at 20 Å using IOPTCELL to avoid the effect of interactions between adjacent fragments. The kinetic energy cutoff of the plane wave used to extend the Kohn-Sham electron wave function was set to 450 eV. The iterative convergence of energy is 10<sup>-5</sup> eV. All atoms were allowed to relax until the Hellmann-Feynman force was less than 0.01 eV/Å. The Brillouin zone was sampled by a 3 × 2 × 1 k-point grid for C-BOB and Cu/WO<sub>2</sub>/C-BOB. The change in Gibbs free energy ( $\Delta G$ ) of NRR intermediates was calculated using

$$\Delta G = \Delta E + \Delta ZPE - T\Delta S$$

Where  $\Delta E$  is the energy change at each step of the reaction,  $\Delta ZPE$  is the zero point energy, T is the temperature (298.15 K), and  $\Delta S$  is the change of entropy. The  $\Delta ZPE$  was calculated by using the vibrational frequency of intermediates. The corrected values of the free energy are calculated by VASPKIT, a plug-in for VASP.

## 8 Apparent quantum efficiency (AQE) calculation

Photocatalytic experiments to calculate AQE were carried out in a photocatalytic double-layer quartz bottle reactor. The catalyst mass, solution volume, reaction time, and simulated solar irradiation area were 10 mg, 100 mL, 1 h, and 30 cm<sup>2</sup> respectively. The monochromatic filters of 420 nm was used to filter the light. The AQE was calculated through the following equation:

$$AQE = \frac{N_e}{N_p} = \frac{6 \times N_{NH_3}}{N_p} = \frac{6 \times n_{NH_3} \times N_A}{\frac{P \times S \times t}{h\nu}} \times 100\%$$

Where,  $N_e$ ,  $N_p$  and  $N_{NH_3}$  represent the number of reacted electrons, incident photons, and generated  $NH_3$ , respectively;  $N_A$  was Avogadro's constant;  $h$  was Planck's constant;  $P$ ,  $S$ , and  $t$  were the incident light intensity, irradiated area, and reaction time respectively.

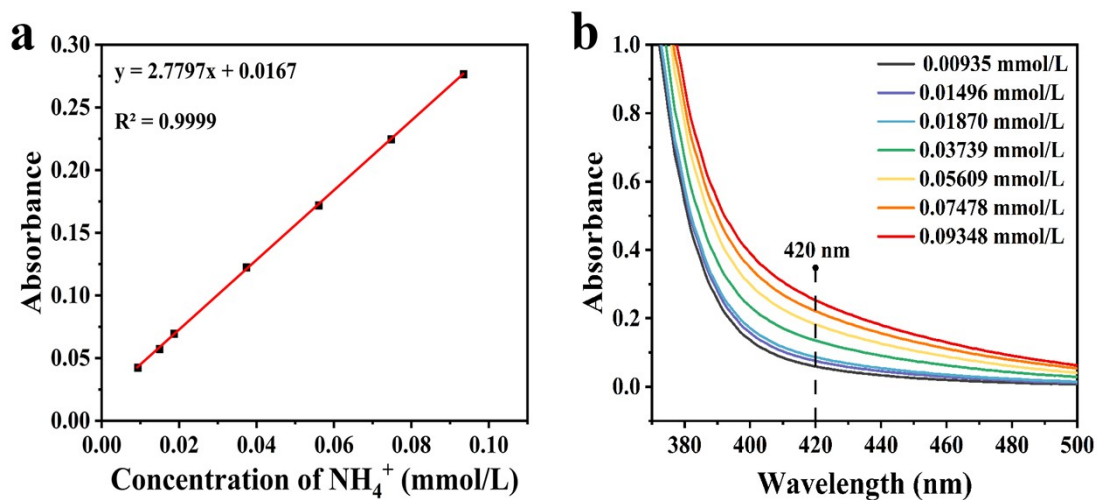

Fig. S1. Standard curves for  $NH_4^+$  with Nessler's reagent.

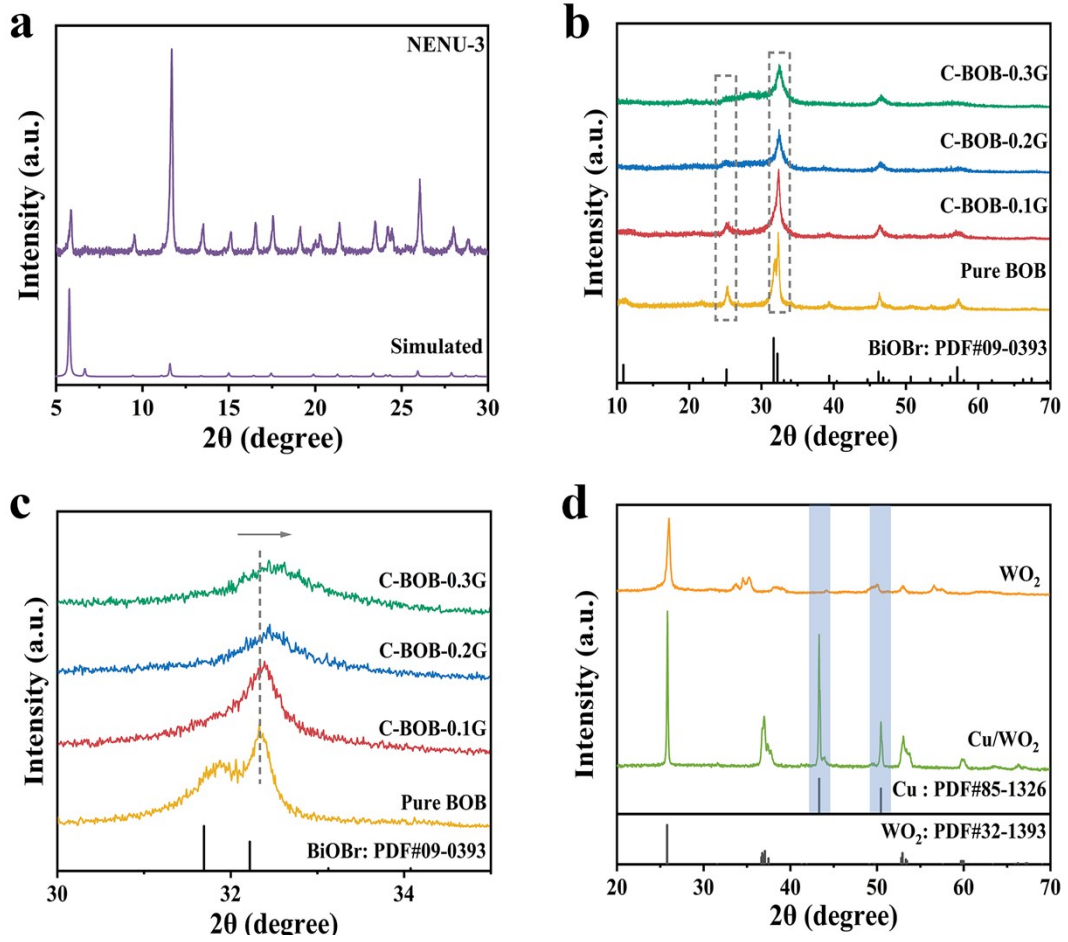

**Fig. S2.** (a) XRD spectra of NENU-3. (b, c) XRD spectra of C-BOB samples with different glucose additions. (d) XRD spectra of  $WO_2$  and Cu/ $WO_2$ .

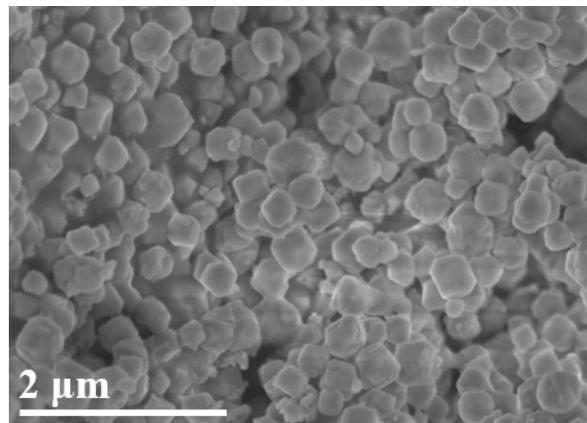

**Fig. S3.** SEM image of NENU-3.

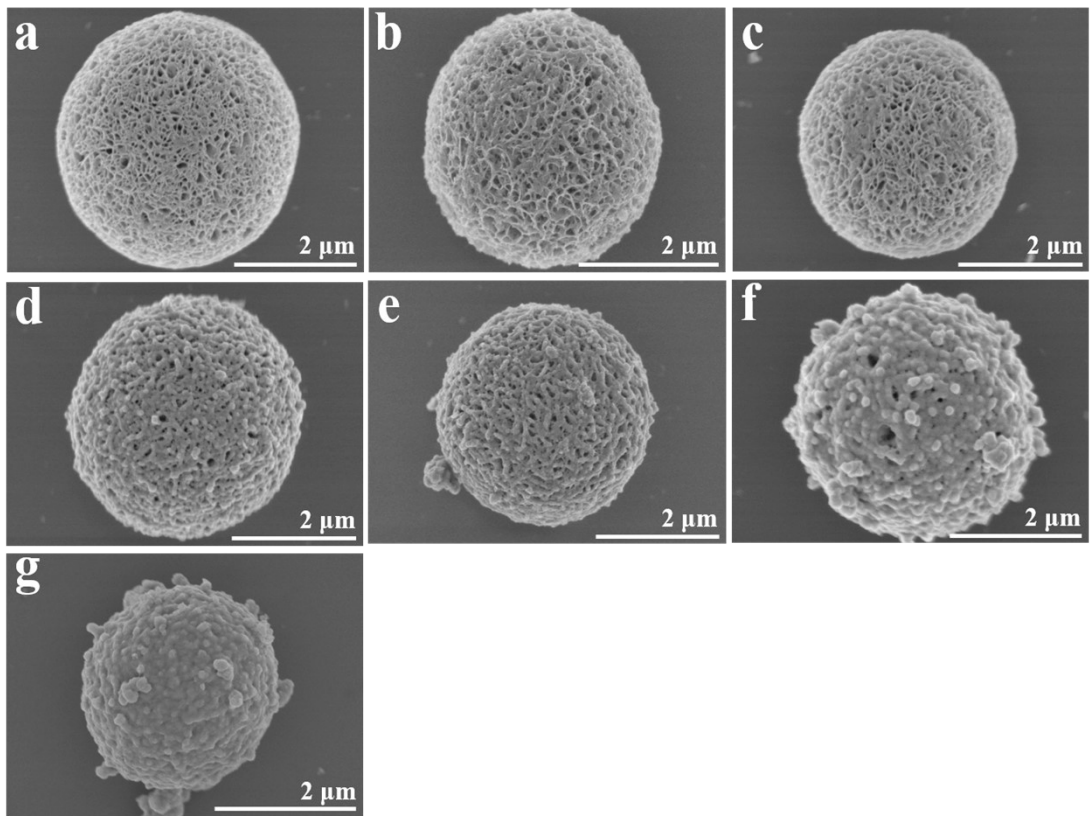

**Fig. S4.** SEM images of Cu/WO<sub>2</sub>/C-BOB-x (x being the mass fraction ratio of Cu/WO<sub>2</sub> doping).

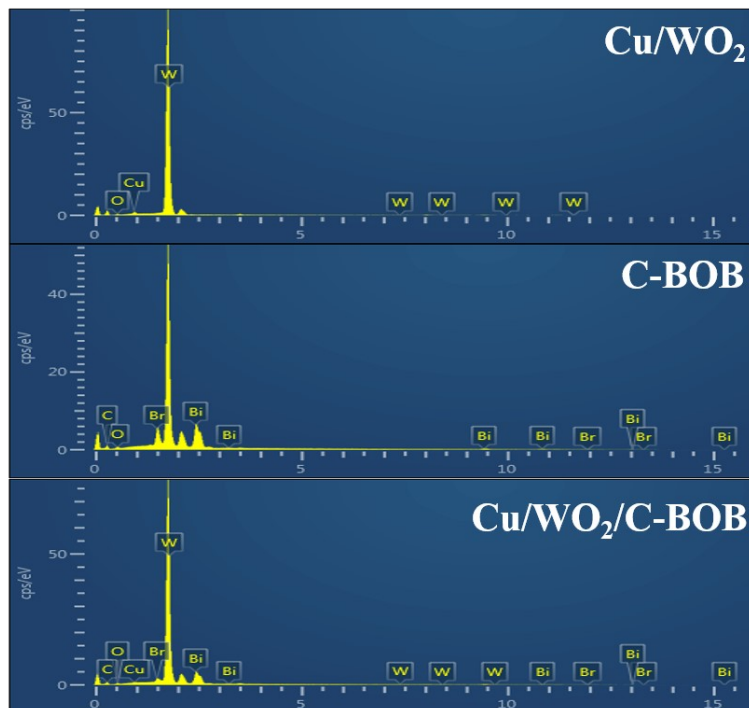

**Fig. S5.** Energy-dispersive X-ray (EDX) spectrum of samples.

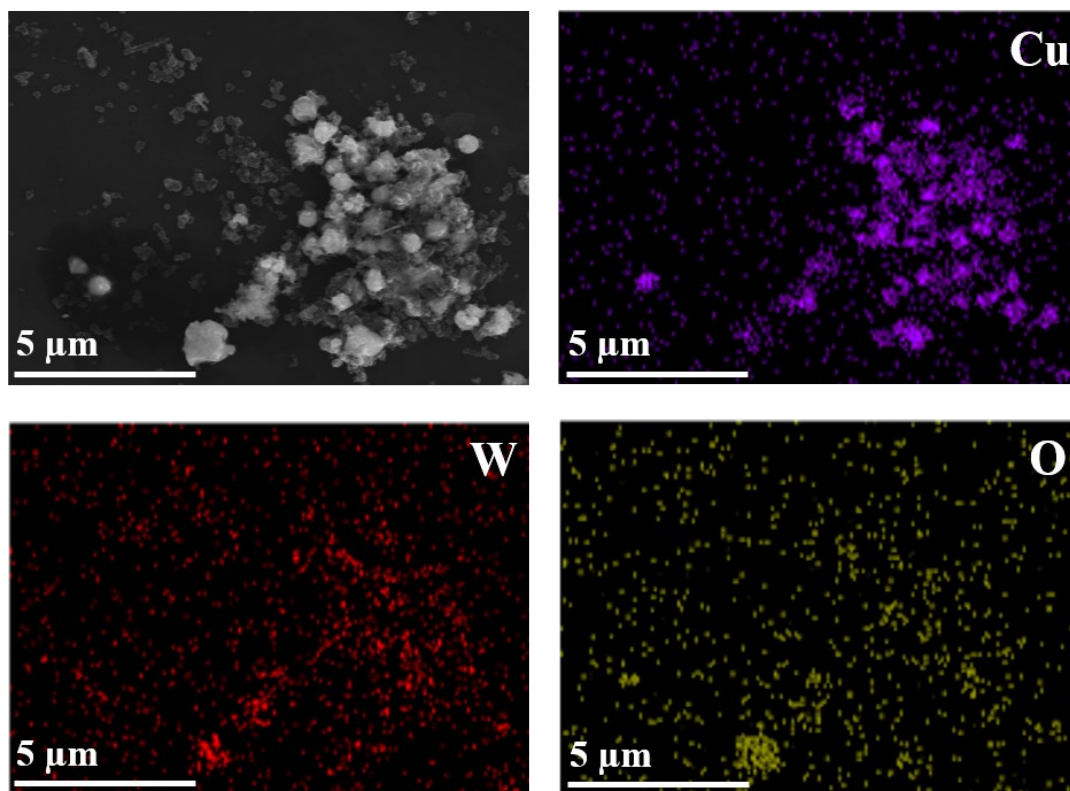

Fig. S6. Elemental mapping of Cu/WO<sub>2</sub>.

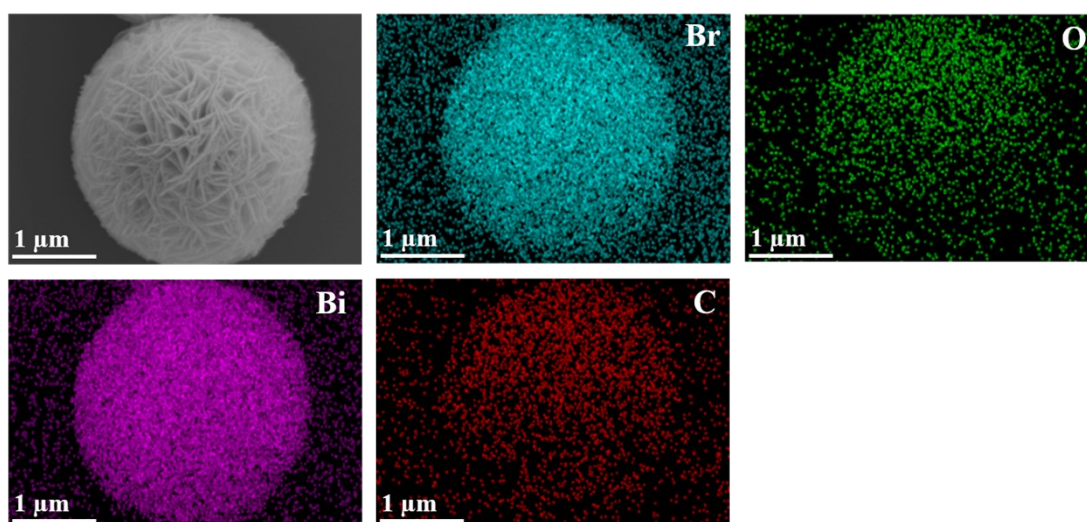

Fig. S7. Elemental mapping of C-BOB.



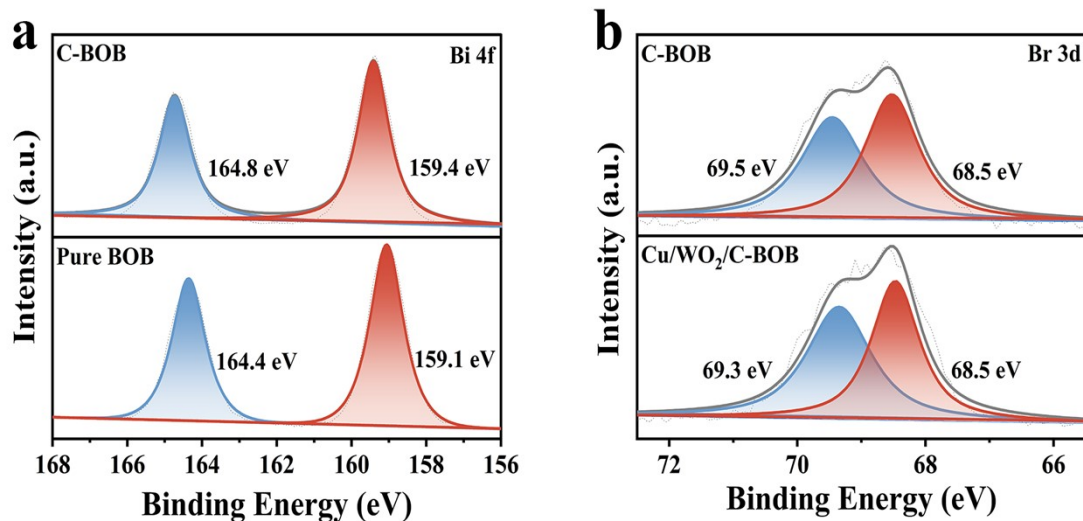

**Fig. S8.** (a) High-resolution XPS spectra of the Bi 4f peaks of Pure BOB and C-BOB. (b) High-resolution XPS spectra of the Br 3d peaks of C-BiOBr and Cu/WO<sub>2</sub>/C-BiOBr.

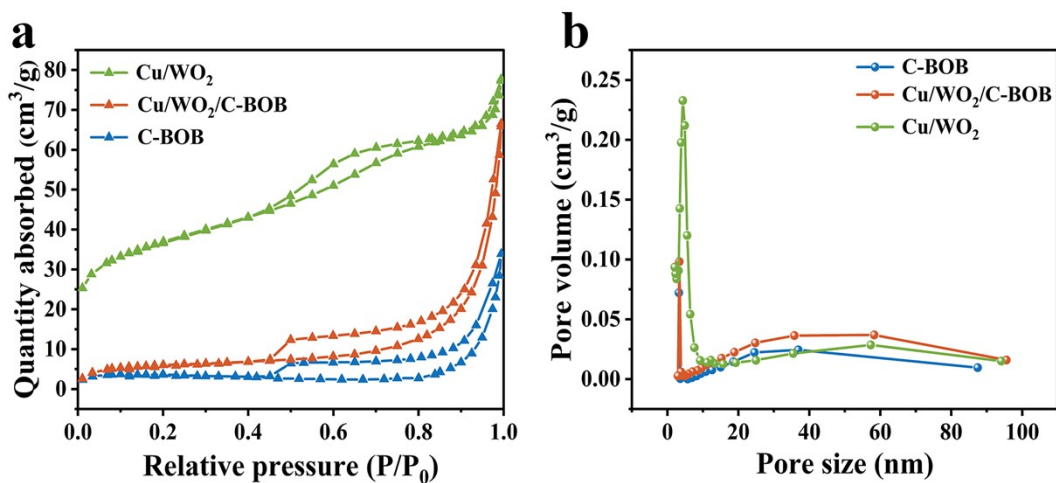

**Fig. S9.** (a) Nitrogen adsorption/ desorption isotherms and (b) pore size distribution of samples.

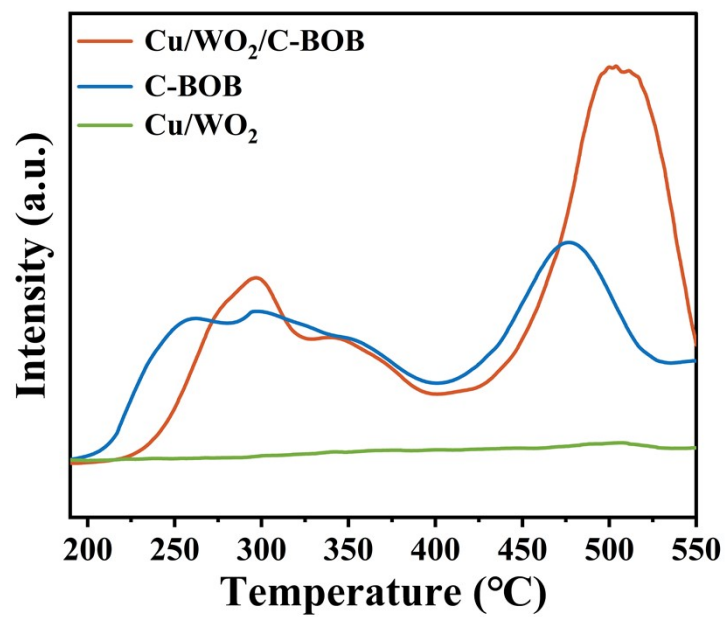

Fig. S10.  $N_2$ -TPD profiles of  $Cu/WO_2$ , C-BOB and  $Cu/WO_2/C-BOB$ .

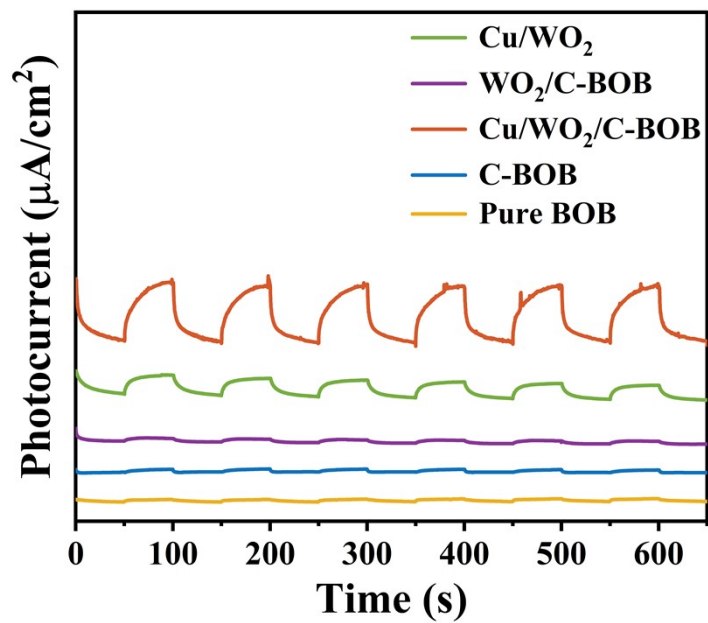

Fig. S11. Transient photocurrent responses of samples ( $\lambda > 700$  nm).

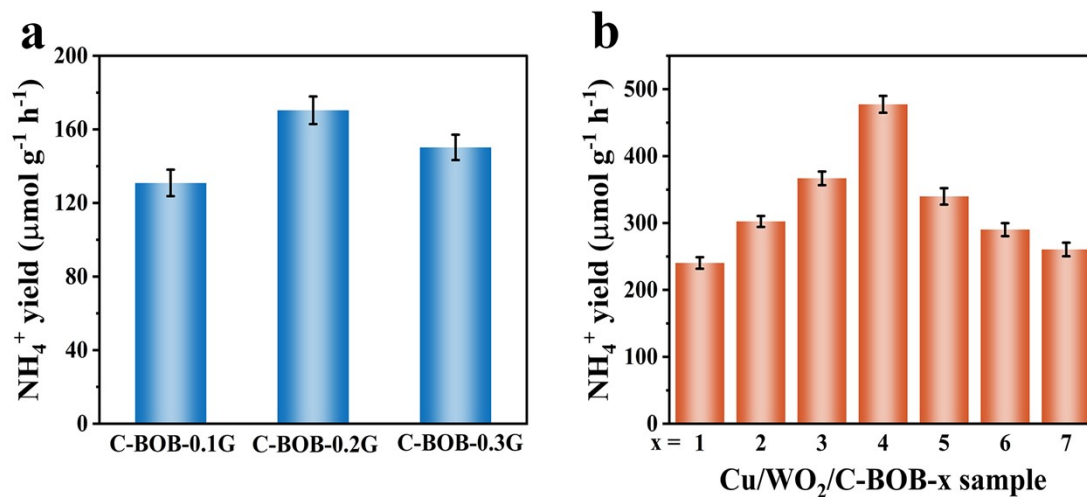

**Fig. S12.** (a) Yields of  $\text{NH}_4^+$  from C-BOB samples with different glucose additions. (b) Yields of  $\text{NH}_4^+$  from Cu/WO<sub>2</sub>/C-BOB-x (x being the mass fraction ratio of Cu/WO<sub>2</sub> doping).

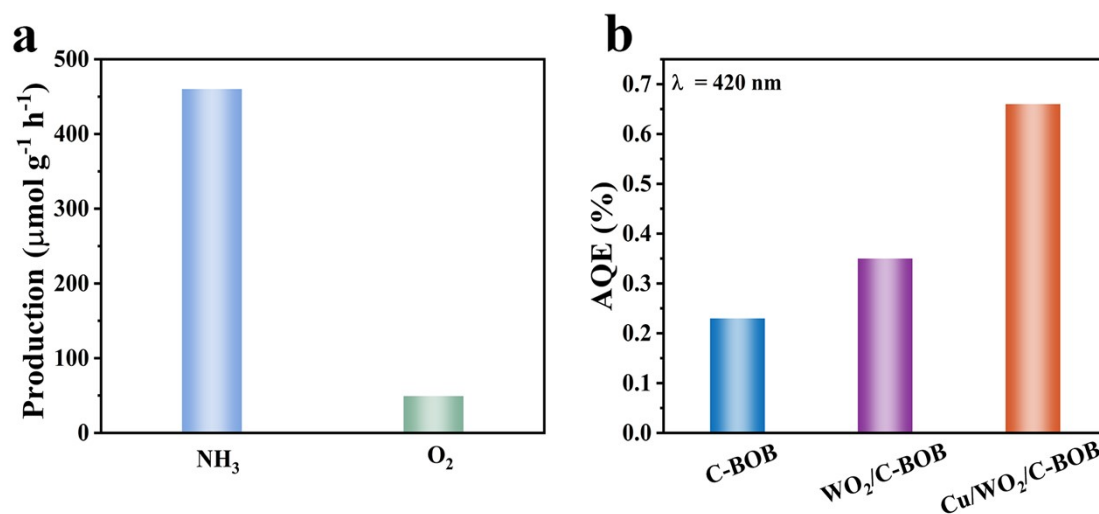

**Figure S13.** (a)  $\text{NH}_3$  and  $\text{O}_2$  production of Cu/WO<sub>2</sub>/C-BOB. (b) The apparent quantum efficiency of different samples at a wavelength of 420 nm.

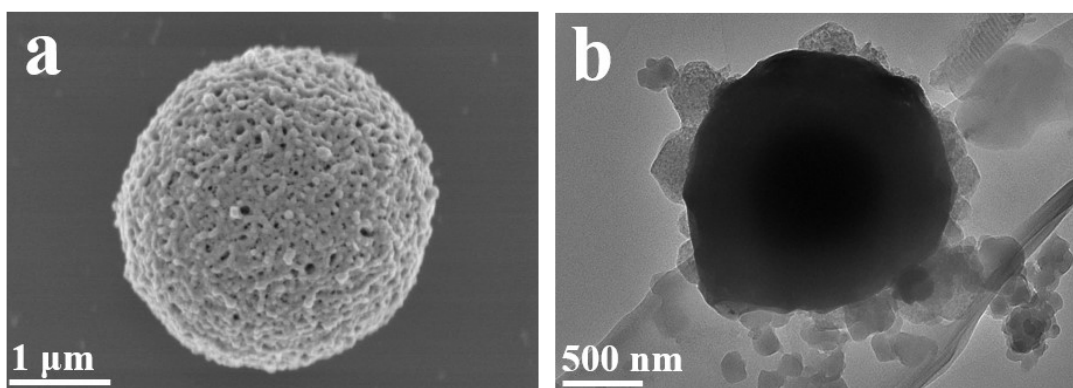

**Fig. S13.** (a) SEM and (b) TEM images of Cu/WO<sub>2</sub>/C-BOB after cycling experiments.

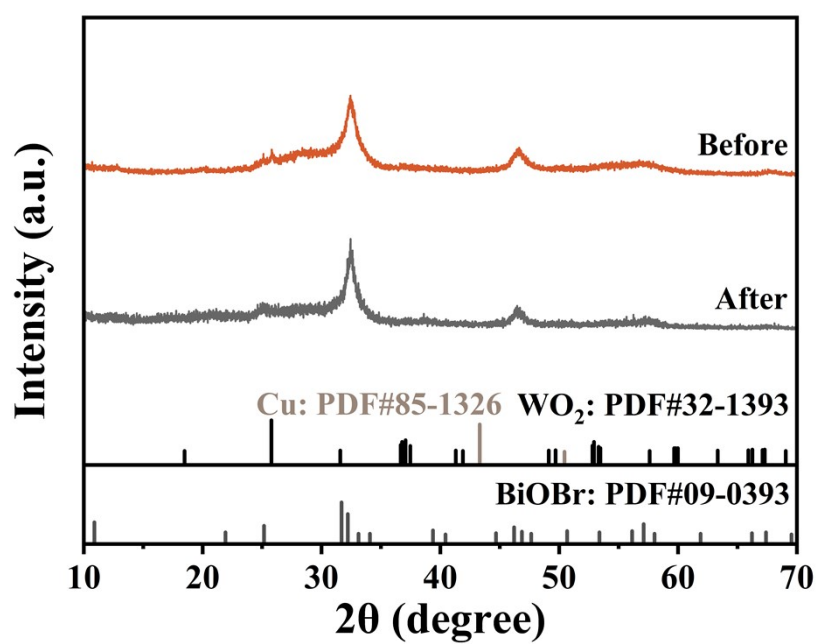

**Fig. S14.** XRD images of Cu/WO<sub>2</sub>/C-BOB before and after cycling experiments.

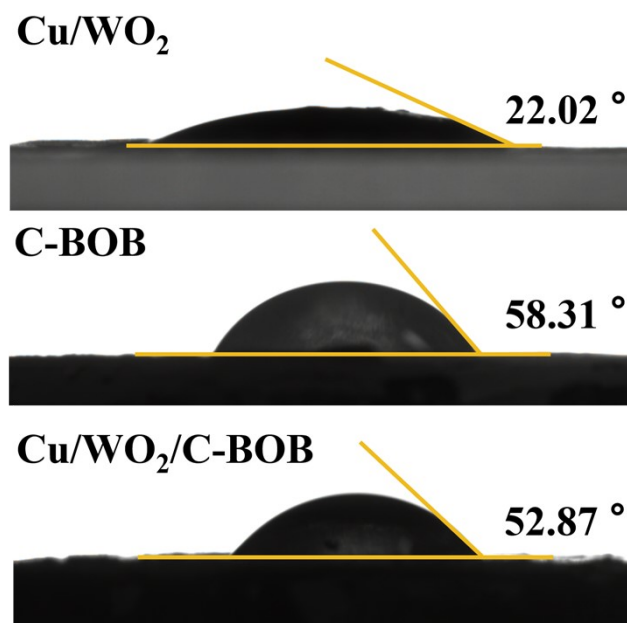

**Fig. S15.** Static water contact-angle measurement of Cu/WO<sub>2</sub> · C-BOB and Cu/WO<sub>2</sub>/C-BOB.

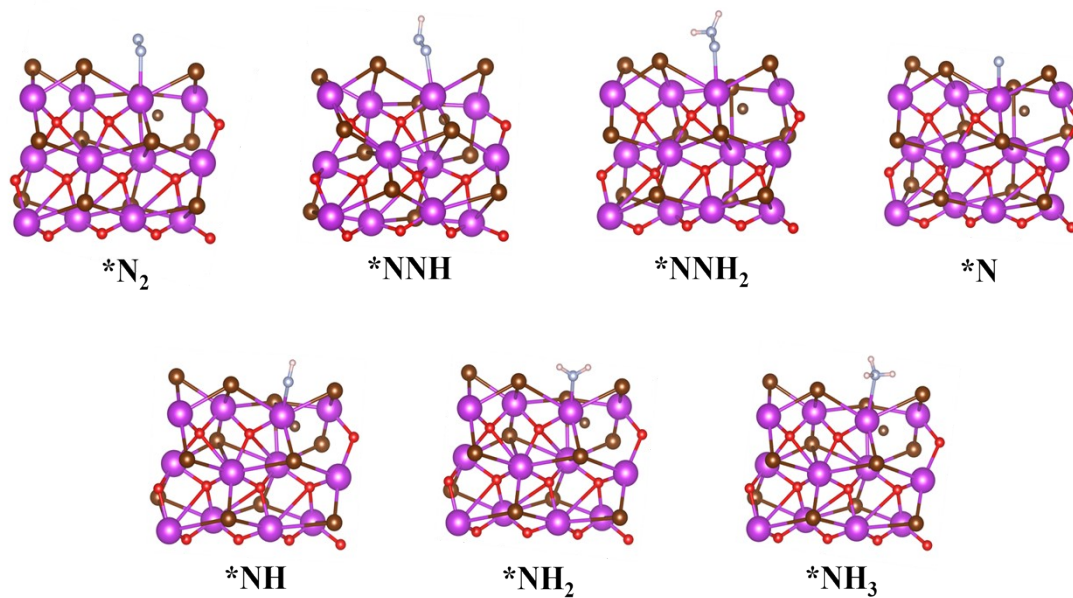

**Fig. S16.** The adsorption diagrams of the N<sub>2</sub> fixation process over C-BOB.

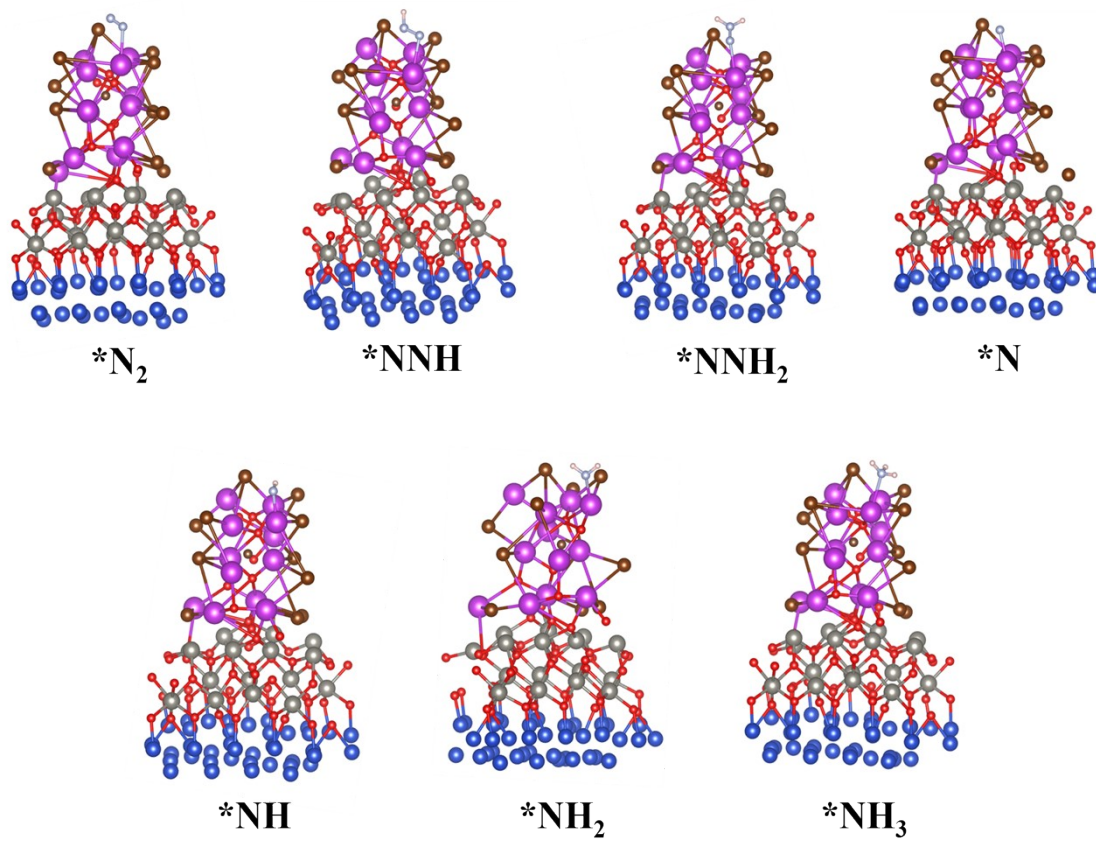

**Fig. S17.** The adsorption diagrams of the N<sub>2</sub> fixation process over Cu/WO<sub>2</sub>/C-BOB.

**Table S1.** Analysis of consequence of element molar content in Cu/WO<sub>2</sub>/C-BOB through EDS and ICP-AES.

| Element              |         | Bi   | Cu   | W    |
|----------------------|---------|------|------|------|
| Molar Percentage (%) | EDS     | 0.71 | 0.26 | 0.15 |
|                      | ICP-AES | 0.74 | 0.28 | 0.19 |

**Table S2.** Oxygen vacancy peak area values for samples.

| Samples                    | Peak area of oxygen vacancies |
|----------------------------|-------------------------------|
| Pure BOB                   | 2733.9                        |
| Cu/WO <sub>2</sub>         | 8633.4                        |
| C-BOB                      | 7674.1                        |
| Cu/WO <sub>2</sub> / C-BOB | 10358.0                       |

**Table S3.** Comparison of photocatalytic nitrogen fixation performance of reported bismuth-based materials.

| <b>Catalyst</b>                                                                            | <b>sacrificial reagent</b>                                                               | <b>NH<sub>3</sub> production<br/>rate (<math>\mu\text{mol g}^{-1} \text{h}^{-1}</math>)</b> | <b>Ref.</b>      |
|--------------------------------------------------------------------------------------------|------------------------------------------------------------------------------------------|---------------------------------------------------------------------------------------------|------------------|
| C-BiOI                                                                                     | Ethanol                                                                                  | 31.1                                                                                        | [5]              |
| BiOBr/Bi <sub>4</sub> O <sub>5</sub> Br <sub>2</sub>                                       | None                                                                                     | 66.87                                                                                       | [6]              |
| Bi <sub>2</sub> O <sub>2</sub> CO <sub>3</sub> (OVs)                                       | 0.5 M Na <sub>2</sub> SO <sub>4</sub> (aq)                                               | 58.9                                                                                        | [7]              |
| Cu-Bi <sub>2</sub> MoO <sub>6</sub>                                                        | Methanol                                                                                 | 31.4                                                                                        | [8]              |
| Bi-Bi <sub>2</sub> O <sub>3</sub> /<br>KTa <sub>0.5</sub> Nb <sub>0.5</sub> O <sub>3</sub> | Methanol                                                                                 | 46.62                                                                                       | [9]              |
| Bi <sub>2</sub> Sn <sub>2</sub> O <sub>7</sub> QDs                                         | None                                                                                     | 334.8                                                                                       | [10]             |
| BSO-UNPs                                                                                   | None                                                                                     | 231                                                                                         | [11]             |
| Bi <sub>2</sub> Sn <sub>2</sub> O <sub>7</sub> /BiOBr                                      | None                                                                                     | 459.04                                                                                      | [12]             |
| BOB-001-OVs                                                                                | None                                                                                     | 223.3                                                                                       | [13]             |
| Bi <sub>2</sub> MoO <sub>6</sub> /<br>OV-BiOBr                                             | None                                                                                     | 90.7                                                                                        | [14]             |
| VO-BiOBr                                                                                   | None                                                                                     | 54.7                                                                                        | [15]             |
| Pt/BOB-VO                                                                                  | None                                                                                     | 23.8                                                                                        | [16]             |
| Bi/BiOBr                                                                                   | 0.025 M H <sub>2</sub> SO <sub>4</sub> /<br>0.025 M Na <sub>2</sub> SO <sub>3</sub> (aq) | 55.65                                                                                       | [17]             |
| Bi-Bi <sub>2</sub> O <sub>3</sub> /<br>CdWO <sub>4</sub>                                   | Methanol                                                                                 | 43.49                                                                                       | [18]             |
| OVs-BiVO <sub>4</sub>                                                                      | Methanol                                                                                 | 32.4                                                                                        | [19]             |
| <b>Cu/WO<sub>2</sub>/C-BOB</b>                                                             | <b>None</b>                                                                              | <b>477.5</b>                                                                                | <b>This work</b> |



## References

- 1 Y. Sun, H. Ji, Y. Sun, G. Zhang, H. Zhou, S. Cao, S. Liu, L. Zhang, W. Li, X. Zhu, H. Pang, Synergistic effect of oxygen vacancy and high porosity of nano MIL-125(Ti) for enhanced photocatalytic nitrogen fixation. *Angew. Chem. Int. Ed.*, 2023, n/a, e202316973.
- 2 G. Dong, X. Huang, Y. Bi, Anchoring black phosphorus quantum dots on Fe-doped  $W_{18}O_{49}$  nanowires for efficient photocatalytic nitrogen fixation. *Angew. Chem. Int. Ed.*, 2022, **61**, e202204271.
- 3 G. Kresse, J. Furthmüller, Efficiency of Ab-Initio total energy calculations for 34metals and semiconductors using a Plane-Wave basis set. *Comp. Mater. Sci.*, 1996, **6**, 15-50.
- 4 J.P. Perdew, K. Burke, M. Ernzerhof, Generalized gradient approximation made simple. *Phys. Rev. Lett.*, 1996, **77**, 3865-3868.
- 5 L. Zeng, F. Zhe, Y. Wang, Q.L. Zhang, X.Y. Zhao, X. Hu, Y. Wu, Y.M. He, Preparation of interstitial carbon doped BiOI for enhanced performance in photocatalytic nitrogen fixation and methyl orange degradation, *J. Colloid Interface Sci.*, 2019, **539**, 563-574.
- 6 H.Q. Wang, Z.H. Chen, Y.R. Shang, C.D. Lv, X.H. Zhang, F. Li, Q.Z. Huang, X.D. Liu, W.M. Liu, L. Zhao, Boosting carrier separation on a BiOBr/Bi<sub>4</sub>O<sub>5</sub>Br<sub>2</sub> direct Z-Scheme heterojunction for superior photocatalytic nitrogen fixation, *ACS Catal.*, 2024, **14**, 5779-5787.
- 7 Y. Feng, Z. Zhang, K. Zhao, S. Lin, H. Li, X. Gao, Photocatalytic nitrogen fixation: oxygen vacancy modified novel micro-nanosheet structure Bi<sub>2</sub>O<sub>2</sub>CO<sub>3</sub> with band gap engineering, *J. Colloid Interface Sci.*, 2021, **583**, 499-509.
- 8 J.F. Wang, C.R. Zhao, S.D. Yuan, X.J. Li, J.Y. Zhang, X. Hu, H.J. Lin, Y. Wu, Y.M. He, One-step fabrication of Cu-doped Bi<sub>2</sub>MoO<sub>6</sub> microflower for enhancing performance in photocatalytic nitrogen fixation, *J. Colloid Interface Sci.*, 2023, **635**, 427-438.

- 9 L. Chen, J.F. Wang, X.J. Li, C.R. Zhao, X. Hu, Y. Wu, Y.M. He, A novel Z-scheme Bi-Bi<sub>2</sub>O<sub>3</sub>/KTa<sub>0.5</sub>Nb<sub>0.5</sub>O<sub>3</sub> heterojunction for efficient photocatalytic conversion of N<sub>2</sub> to NH<sub>3</sub>, *Inorg. Chem. Front.*, 2022, **9**, 2714.
- 10 Y. Zhang, J. Di, X. Qian, M.X. Ji, Z.Q. Tian, L.Q. Ye, J.Z. Zhao, S. Yin, H.M. Li, J.X. Xia, Oxygen vacancies in Bi<sub>2</sub>Sn<sub>2</sub>O<sub>7</sub> quantum dots to trigger efficient photocatalytic nitrogen reduction, *Appl. Catal. B: Environ.*, 2021, **299**, 120680.
- 11 S. Gao, R.J. Wu, M.M. Sun, M. Guo, D.B. DuBois, S.W. Chen, H.D. Ji, C.Z. Wang, Q. Wang, High-performance nitrogen photofixation by Bi<sub>2</sub>Sn<sub>2</sub>O<sub>7</sub> nanoparticles enriched with oxygen vacancies, *Appl. Catal. B: Environ.*, 2023, **324**, 122260.
- 12 Y. Zhang, J. Di, X.W. Zhu, M.X. Ji, C. Chen, Y.A. Liu, L. N. Li, T.G. Wei, H.M. Li, J.X. Xia, Chemical bonding interface in Bi<sub>2</sub>Sn<sub>2</sub>O<sub>7</sub>/BiOBr S-scheme heterojunction triggering efficient N<sub>2</sub> photofixation, *Appl. Catal. B: Environ.*, 2023, **323**, 122148.
- 13 H. Li, J. Shang, Z. Ai, L. Zhang, Efficient visible light nitrogen fixation with BiOBr nanosheets of oxygen vacancies on the exposed {001} facets, *J. Am. Chem. Soc.*, 2015, **137**, 6393-6399.
- 14 X. Xue, R. Chen, C. Yan, Y. Hu, W. Zhang, S. Yang, L. Ma, G. Zhu, Z. Jin, Efficient photocatalytic nitrogen fixation under ambient conditions enabled by the heterojunctions of n-type Bi<sub>2</sub>MoO<sub>6</sub> and oxygen-vacancy-rich p-type BiOBr, *Nanoscale*, 2019, **11**, 10439-10445.
- 15 X. Xue, R. Chen, H. Chen, Y. Hu, Q. Ding, Z. Liu, L. Ma, G. Zhu, W. Zhang, Q. Yu, J. Liu, J. Ma, Z. Jin, Oxygen vacancy engineering promoted photocatalytic ammonia synthesis on ultrathin two dimensional bismuth oxybromide nanosheets, *Nano Lett.*, 2018, **18**, 7372-7377.
- 16 G.M. Ren, M. Shi, Z.Z. Li, Z.S. Zhang, X.C. Meng, Electronic metal-support interaction via defective-induced platinum modified BiOBr for photocatalytic N<sub>2</sub> fixation, *Appl. Catal. B: Environ.*, 2023, **327**, 122462.
- 17 Y.W. Huang, Y.S. Zhu, S.J. Chen, X.Q. Xie, Z.J. Wu, N. Zhang, Schottky junctions with Bi cocatalyst for taming aqueous phase N<sub>2</sub> reduction toward enhanced solar ammonia production, *Adv. Sci.*, 2021, **8**, 2003626.

- 18 C.R. Zhao, X.J. Li, L. Yue, S.D. Yuan, X.J. Ren, Z.H. Zeng, X. Hu, Y. Wu, Y.M. He, One-step preparation of novel Bi-Bi<sub>2</sub>O<sub>3</sub>/CdWO<sub>4</sub> Z-scheme heterojunctions with enhanced performance in photocatalytic NH<sub>3</sub> synthesis, *J. Alloys Compd.*, 2023, **968**, 171956.
- 19 S. Gao, R.J. Wu, M.M. Sun, M. Guo, D.B. DuBois, S.W. Chen, H.D. Ji, C.Z. Wang, Q. Wang, High-performance nitrogen photofixation by Bi<sub>2</sub>Sn<sub>2</sub>O<sub>7</sub> nanoparticles enriched with oxygen vacancies, *Appl. Catal. B: Environ.*, 2023, **324**, 122260.
